# Supplementary material
Source: MDPI journal article supplement (https://www.mdpi.com/2313-0105/8/9/127)
Supplement: s1 [file s1]

## **Supplementary Materials**

### **Sulfur dioxide and sulfolane as additives in organic electrolytes to develop room-temperature sodium batteries**

Débora Ruiz-Martínez\*, Roberto Gómez\*

Departament de Química Física i Institut Universitari d'Electroquímica, Universitat d'Alacant, Apartat 99, E-03080 Alacant, Spain

Correspondence: debora.rm@ua.es (D.R.-M.); Roberto.Gomez@ua.es (R.G.)

#### **Evolution of cyclic voltammetry for each SO<sub>2</sub> concentration and each electrolyte.**

From Figure S1 to S3, the evolution of the cyclic voltammograms for each SO<sub>2</sub> concentration and each electrolyte is shown. In particular, ten successive cycles are displayed in both the presence and absence of SO<sub>2</sub> additive. All experiments were carried out in a three-electrode electrochemical cell using three sodium rods as electrodes. The geometrical area in contact with the electrolyte was approximately 1 cm<sup>2</sup> for each sodium electrode.

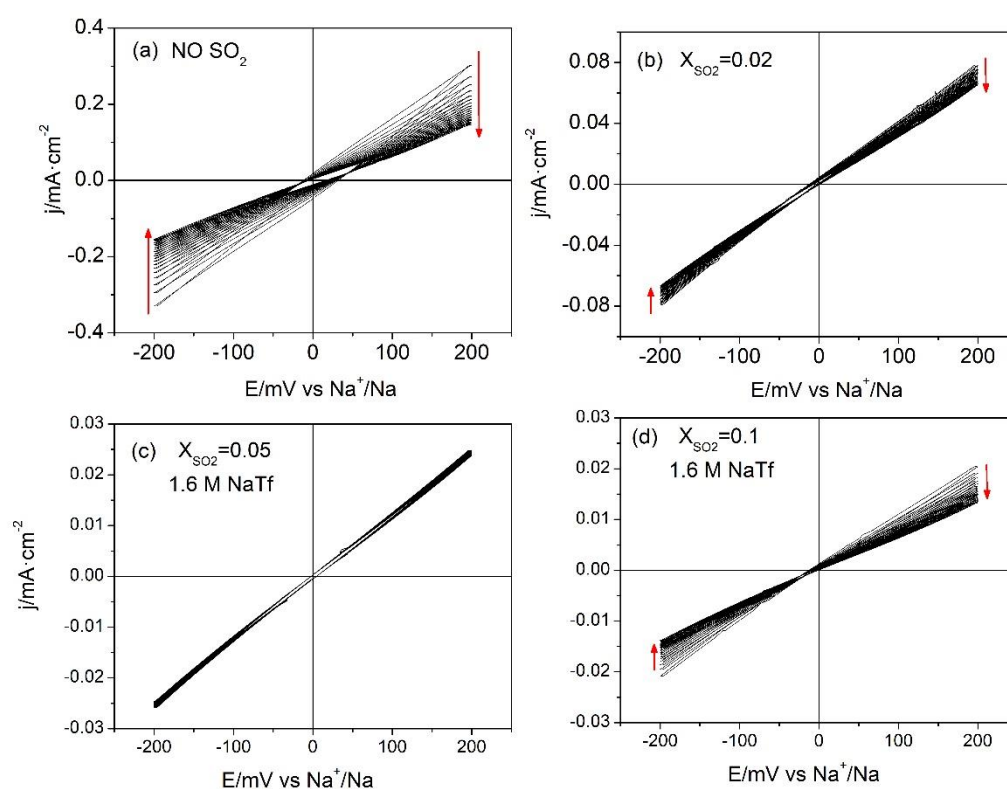

**Figure S1.** CVs for Na-on-Na deposition/stripping in: (a), (b) 2M NaTf /DOL:DME without and with 0.02  $\text{SO}_2$  mole fraction. (c), (d) 1.6 M NaTf /DOL:DME with 0.05 and 0.1  $\text{SO}_2$  mole fraction.

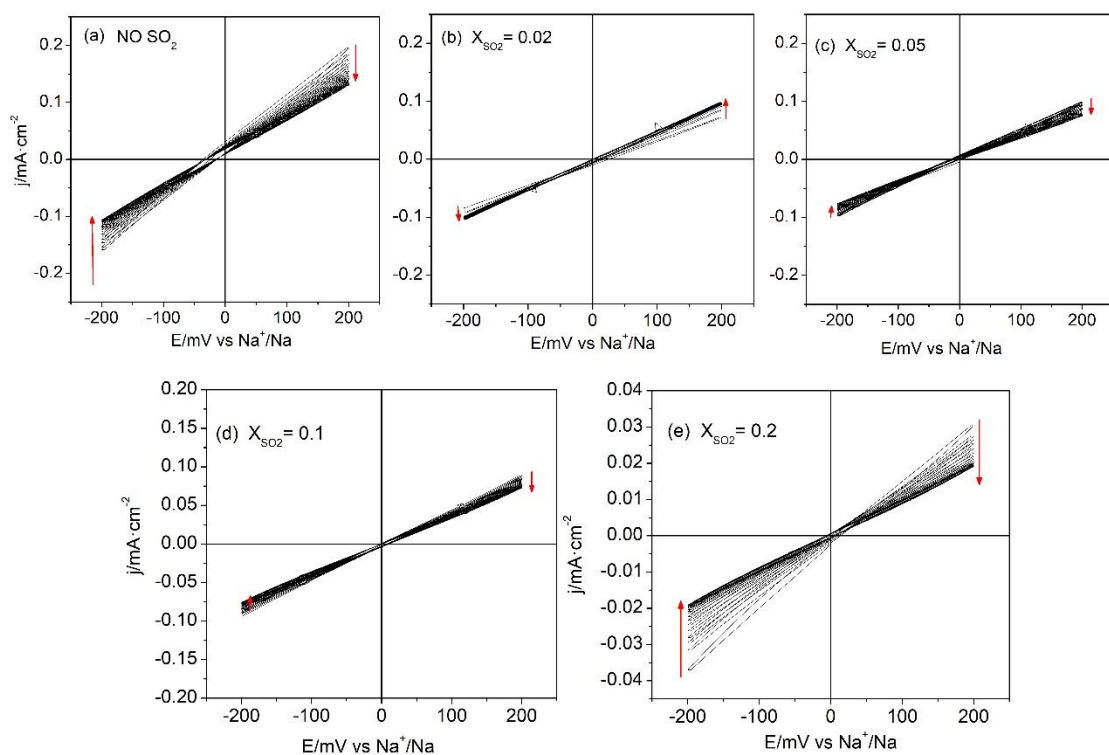

**Figure S2.** Figure S2. CVs for Na-on-Na deposition in 2 M NaSCN/DOL:DME containing  $\text{SO}_2$  mole fractions of (a) 0, (b) 0.02, (c) 0.05, (d) 0.10 and (e) 0.20

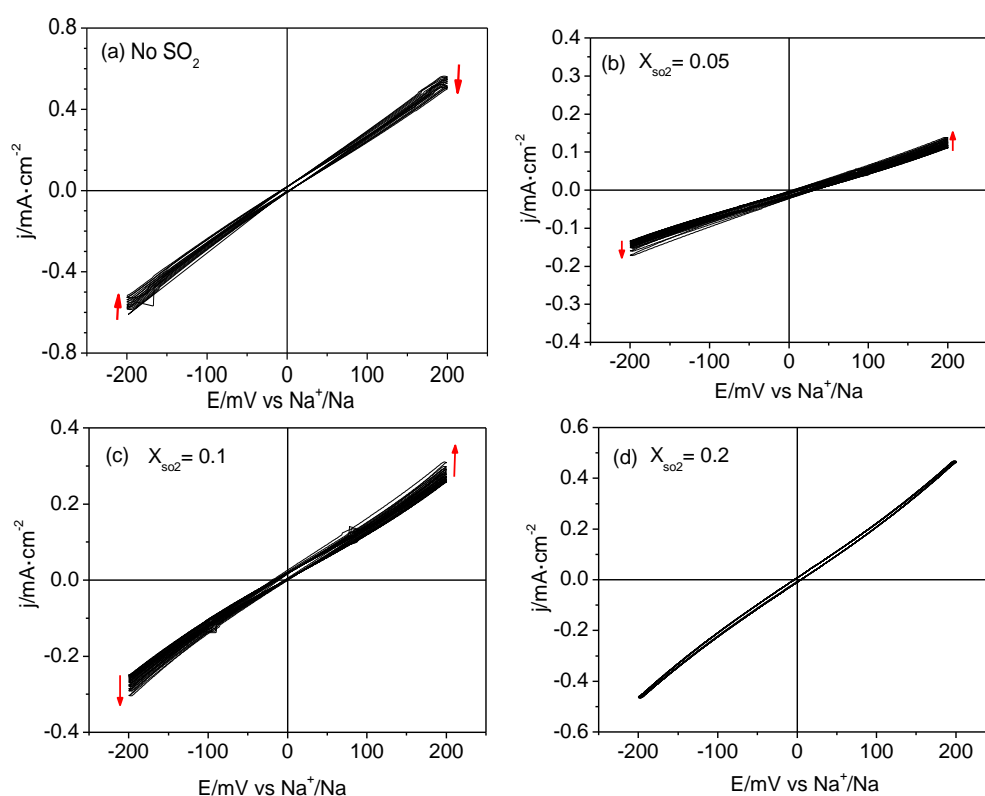

**Figure S3.** Cyclic voltammograms for Na-on-Na deposition/stripping in 1M NaClO<sub>4</sub>/PC containing SO<sub>2</sub> mole fractions of (a) 0, (b) 0.05, (c) 0.10 and (d) 0.20.
